# Supplementary material for: Facile one-step synthesis of hierarchical porous carbon monoliths as superior supports of Fe-based catalysts for CO2 hydrogenation
Source: Royal Society of Chemistry journal article supplement (doi:10.1039/c5ra26009d), 2016-01-01
Supplement: c5ra26009d1.pdf [file c5ra26009d1.pdf]

## Electronic Supplementary Information

### Facile one-step synthesis of hierarchical porous carbon monoliths as superior support of Fe-based catalyst for CO<sub>2</sub> hydrogenation

Chengyi Dai,<sup>a</sup> Anfeng Zhang,<sup>a</sup> Min Liu,<sup>a</sup> Junjie Li,<sup>a</sup> Fangyu Song,<sup>a</sup> Chunshan Song<sup>a,b\*</sup> and Xinwen Guo<sup>a\*</sup>

<sup>a</sup> State Key Laboratory of Fine Chemicals, PSU-DUT Joint Center for Energy Research, School of Chemical Engineering, Dalian University of Technology, Dalian 116024, P. R. China. Fax: +86-0411-84986134; Tel: +86-0411-84986133, +86-0411-84986134; E-mail: guoxw@dlut.edu.cn

<sup>b</sup> EMS Energy Institute, PSU-DUT Joint Center for Energy Research, Department of Energy & Mineral Engineering, and Department of Chemical Engineering Pennsylvania State University, University Park, Pennsylvania 16802, United States. Fax: 814-865-3573; Tel: 814-863-4466; E-mail: csong@psu.edu

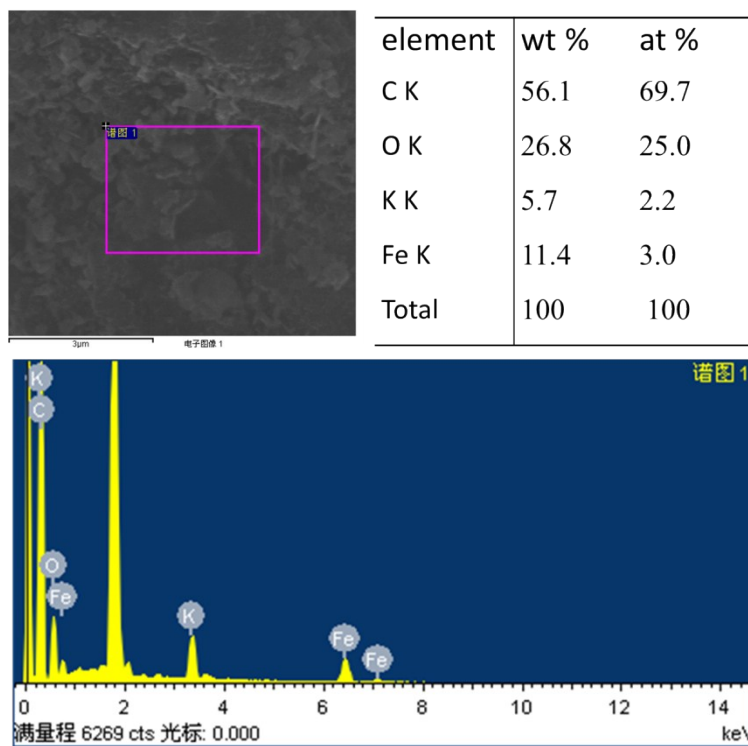

**Fig. S1.** SEM image of Fe-K/HPCMs-1, and quantified phase compositions from SEM maps measured by energy dispersive X-ray

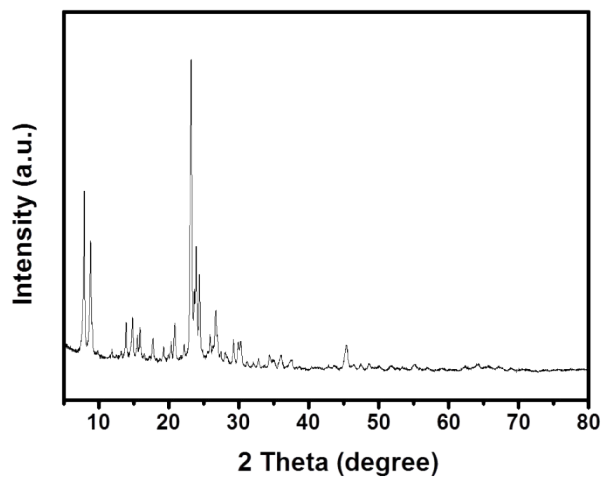

**Fig. S2.** XRD pattern of spent CAT-1

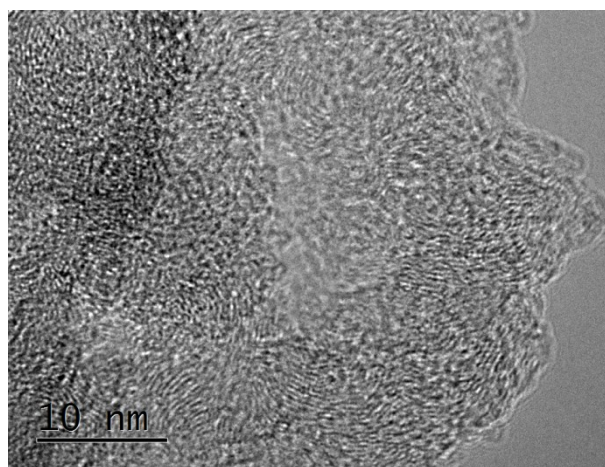

**Fig. S3.** HRTEM image of HPCMs-1

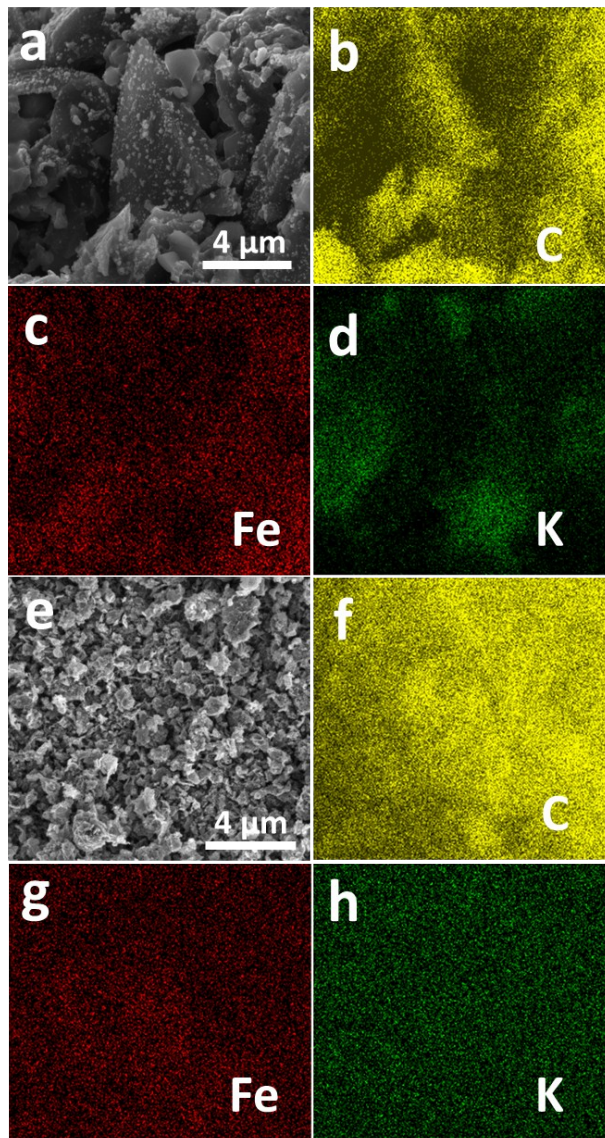

**Fig. S4** SEM images, carbon (yellow), iron (red) and potassium (green) element mapping images of Fe-K/AC (a, b, c, d) and Fe-K/HPCMs-1 (e, f, g, h), respectively
